# Supplementary material for: Predictors of Psychological Distress among Post-Operative Cardiac Patients: A Narrative Review
Source: MDPI journal article supplement (doi:10.3390/healthcare11202721), 2023-10-12
Supplement: s1 [file s1]

**Supplementary Table S1***Summary of Reviewed Studies by Related Factors*

| Author<br>(year)<br>and<br>country                | Search<br>Methodolog<br>y used | Methodological<br>design                                                                                                                                                                           | Intervention<br>content | Control<br>content | Interesting<br>findings                                                                                                                                                                                      |
|---------------------------------------------------|--------------------------------|----------------------------------------------------------------------------------------------------------------------------------------------------------------------------------------------------|-------------------------|--------------------|--------------------------------------------------------------------------------------------------------------------------------------------------------------------------------------------------------------|
| Personal factors                                  |                                |                                                                                                                                                                                                    |                         |                    |                                                                                                                                                                                                              |
| Perski et al. (1998) / Sweden                     | Database search                | Prospective observational study <ul style="list-style-type: none"> <li>• T0: baseline pre-operation</li> <li>• T1: one-year post-operation</li> <li>• T2: three years post-operation</li> </ul>    | -                       | -                  | Patients with elevated psychological distress pre-operation has higher symptoms at T1 and higher rate of cardiac events at T2                                                                                |
| Heijmeriks et al. (1999) / The Netherlands        | Database search                | Prospective observational study <ul style="list-style-type: none"> <li>• T0: baseline (pre-operation)</li> <li>• T1: two months post-operation</li> <li>• T2: six months post-operation</li> </ul> | -                       | -                  | Elderly and younger patients have same surgical and one-year mortality rate<br>Both had improved quality of life responses                                                                                   |
| Peterson et al. (2002) / United States of America | Database search                | Prospective observational study <ul style="list-style-type: none"> <li>• T0: baseline pre-operation</li> <li>• T1: six months post-operation</li> <li>• T2: 36 months post-operation</li> </ul>    | -                       | -                  | Increase in depression at six months post-operation was associated with cardiac events in the following period                                                                                               |
| Jackson et al. (2005) / Canada                    | Citation search                | Quantitative review                                                                                                                                                                                | -                       | -                  | Patients most likely to attend cardiac rehabilitation with physician endorsement, patient has a high self-efficacy, easily accessible, patient is educated and is married<br>Patients least likely to attend |

| Author<br>(year)<br>and<br>country                              | Search<br>Methodolog<br>y used | Methodological<br>design                                                                                                                                                                                                       | Intervention<br>content | Control<br>content | Interesting<br>findings                                                                                                                                                                                                                                                                                                        |
|-----------------------------------------------------------------|--------------------------------|--------------------------------------------------------------------------------------------------------------------------------------------------------------------------------------------------------------------------------|-------------------------|--------------------|--------------------------------------------------------------------------------------------------------------------------------------------------------------------------------------------------------------------------------------------------------------------------------------------------------------------------------|
|                                                                 |                                |                                                                                                                                                                                                                                |                         |                    | when<br>rehabilitation<br>requires long<br>distance travel                                                                                                                                                                                                                                                                     |
| Gravelly-<br>Witte et<br>al. (2007)<br>/ Canada                 | Database<br>search             | Prospective<br>observational<br>study <ul style="list-style-type: none"> <li>• T0: baseline<br/>(45 days post-<br/>hospital<br/>admission)</li> <li>• T1: six months<br/>post-hospital<br/>admission</li> </ul>                | -                       | -                  | Higher self-<br>reported levels<br>of depression<br>were associated<br>with past<br>cardiac history<br>at six months<br>post-operation<br><br>Angina was<br>associated with<br>higher self-<br>reported levels<br>of depression,<br>worse<br>emotional,<br>physical and<br>social health-<br>related quality<br>of life scores |
| Gjeilo et<br>al. (2008)<br>/ Norway                             | Database<br>search             | Prospective<br>observational<br>study <ul style="list-style-type: none"> <li>• T0: baseline</li> <li>• T1: six months<br/>post-operation</li> <li>• T2: one-year<br/>post-operation</li> </ul>                                 | -                       | -                  | Female patients<br>reported lower<br>quality of life<br>scores than male<br>patients (pre-<br>and post-<br>operation)<br>Overall<br>improvement in<br>quality-of-life<br>scores post-<br>surgery<br>Difference in sex<br>most evident at<br>T1                                                                                 |
| Whooley<br>et al.<br>(2008) /<br>United<br>States of<br>America | Database<br>search             | Prospective<br>observational<br>study <ul style="list-style-type: none"> <li>• T0: baseline</li> <li>• T1: one-year<br/>post-<br/>recruitment</li> <li>• T2+: Annual<br/>check-ups<br/>until study<br/>ceased eight</li> </ul> | -                       | -                  | Depression was<br>associated with<br>future cardiac<br>events<br>Physical<br>inactivity<br>mediates the<br>association<br>between<br>depression and<br>cardiac events                                                                                                                                                          |

| Author<br>(year)<br>and<br>country                           | Search<br>Methodology used | Methodological<br>design                                                                                                                                                                                              | Intervention<br>content                                                                                                                                                                                                                                                                                                               | Control<br>content | Interesting<br>findings                                                                                                                                                             |
|--------------------------------------------------------------|----------------------------|-----------------------------------------------------------------------------------------------------------------------------------------------------------------------------------------------------------------------|---------------------------------------------------------------------------------------------------------------------------------------------------------------------------------------------------------------------------------------------------------------------------------------------------------------------------------------|--------------------|-------------------------------------------------------------------------------------------------------------------------------------------------------------------------------------|
|                                                              |                            | years after<br>commencement                                                                                                                                                                                           |                                                                                                                                                                                                                                                                                                                                       |                    |                                                                                                                                                                                     |
| McKenzie<br>et al.<br>(2010) /<br>England                    | Database<br>search         | Systematic review                                                                                                                                                                                                     | -                                                                                                                                                                                                                                                                                                                                     | -                  | Depressive and<br>anxiety<br>symptoms best<br>predicted by<br>pre-operative<br>measures<br>Gender and age<br>were<br>inconclusive<br>predictors                                     |
| Morone et<br>al. (2010)<br>/ United<br>States of<br>America  | Database<br>search         | RCT <ul style="list-style-type: none"> <li>• T0: baseline<br/>(two weeks<br/>post-<br/>hospitalisation<br/>)</li> <li>• T1: two<br/>months post-<br/>operation</li> <li>• T2: 12 months<br/>post-operation</li> </ul> | Depressed<br>intervention<br>consisted of<br>eight months<br>of:<br>(a) telephone<br>calls to patients<br>to arrange care<br>(e.g.,<br>workbooks on<br>depression,<br>medication,<br>reference to<br>mental health<br>specialist)<br>(b) weekly<br>case reviews<br>with nurse care<br>manager, study<br>psychiatrist<br>and internist | Usual care         | Depressed<br>patients had<br>worse pain<br>scores compared<br>to non-<br>depressed<br>Collaborative<br>care associated<br>with better pain<br>scores among<br>depressed<br>patients |
| Kendel et<br>al. (2011)<br>/ Germany                         | Database<br>search         | Prospective<br>observational<br>study <ul style="list-style-type: none"> <li>• T0: baseline<br/>pre-operation</li> <li>• T1: one-year<br/>post-operation</li> </ul>                                                   | -                                                                                                                                                                                                                                                                                                                                     | -                  | Both men and<br>women reported<br>improved<br>quality of life<br>scores<br>Gender was an<br>independent<br>marker for role<br>functioning                                           |
| Herring et<br>al. (2012)<br>/ United<br>States of<br>America | Database<br>search         | Systematic review<br>and meta-analysis                                                                                                                                                                                | -                                                                                                                                                                                                                                                                                                                                     | -                  | Exercise reduced<br>depression<br>among chronic<br>patients<br>This was most<br>apparent among                                                                                      |

| Author<br>(year)<br>and<br>country | Search<br>Methodology used | Methodological<br>design                                                                                                                                                                                                               | Intervention<br>content | Control<br>content | Interesting<br>findings                                                                                                                                                                                                                                                                                                                                                                        |
|------------------------------------|----------------------------|----------------------------------------------------------------------------------------------------------------------------------------------------------------------------------------------------------------------------------------|-------------------------|--------------------|------------------------------------------------------------------------------------------------------------------------------------------------------------------------------------------------------------------------------------------------------------------------------------------------------------------------------------------------------------------------------------------------|
|                                    |                            |                                                                                                                                                                                                                                        |                         |                    | patients with high baseline depression scores                                                                                                                                                                                                                                                                                                                                                  |
| Horne et al. (2013a) / Canada      | Citation search            | Prospective observational study <ul style="list-style-type: none"> <li>• T0: baseline (pre-operation)</li> <li>• T1: hospital discharge</li> <li>• T2: three months post-operation</li> <li>• T3: six months post-operation</li> </ul> | -                       | -                  | Depression was independently associated with physical inactivity, pre-operative depression, over seven days in hospital post-operation, stressful post-operative events, pre-operative left ventricular ejection fraction < 50% and cardiopulmonary bypass time > 120 minutes<br>Physical inactivity associated with both pre-operative depression and post-operative depression at six months |
| Horne et al. (2013b) / Canada      | Database search            | Prospective observational study <ul style="list-style-type: none"> <li>• T0: baseline (pre-operation)</li> <li>• T1: hospital discharge</li> <li>• T2: three months post-operation</li> <li>• T3: six months post-operation</li> </ul> | -                       | -                  | Depression was independently associated with physical inactivity, pre-operative depression, over seven days in hospital post-operation, stressful post-operative events, pre-                                                                                                                                                                                                                  |

| Author<br>(year)<br>and<br>country                     | Search<br>Methodolog<br>y used | Methodological<br>design                                                                                                                                                                                                                                                                               | Intervention<br>content                                                                                                                                                                                                   | Control<br>content | Interesting<br>findings                                                                                                                                                                                           |
|--------------------------------------------------------|--------------------------------|--------------------------------------------------------------------------------------------------------------------------------------------------------------------------------------------------------------------------------------------------------------------------------------------------------|---------------------------------------------------------------------------------------------------------------------------------------------------------------------------------------------------------------------------|--------------------|-------------------------------------------------------------------------------------------------------------------------------------------------------------------------------------------------------------------|
|                                                        |                                |                                                                                                                                                                                                                                                                                                        |                                                                                                                                                                                                                           |                    | operative left ventricular ejection fraction < 50% and cardiopulmonary bypass time > 120 minutes<br>Physical inactivity associated with both pre-operative depression and post-operative depression at six months |
| Tamis-Holland et al. (2013) / United States of America | Database search                | Randomised 2x2 factorial study <ul style="list-style-type: none"> <li>• T0: baseline</li> <li>• T1: one-year post-discharge</li> <li>• T2: two-year post-discharge</li> <li>• T3: three-year post-discharge</li> <li>• T4: four-year post-discharge</li> <li>• T5: five-year post-discharge</li> </ul> | Prompt revascularization plus intensive medical therapy <i>versus</i> Initial intensive medical therapy alone with clinically indicated revascularization on Insulin-providing <i>versus</i> Insulin-sensitizing strategy | -                  | Women reported more angina than men                                                                                                                                                                               |
| Fiuza-Luces (2018) / Spain                             | Database search                | Narrative literature review                                                                                                                                                                                                                                                                            | -                                                                                                                                                                                                                         | -                  | Exercise healthy level of anti-inflammatory milieu, myocardial regeneration, and ameliorates age-related loss of muscle mass and strength                                                                         |

| Author<br>(year)<br>and<br>country               | Search<br>Methodolog<br>y used | Methodological<br>design                                                                                                                            | Intervention<br>content | Control<br>content | Interesting<br>findings                                                                                                                                                                                                        |
|--------------------------------------------------|--------------------------------|-----------------------------------------------------------------------------------------------------------------------------------------------------|-------------------------|--------------------|--------------------------------------------------------------------------------------------------------------------------------------------------------------------------------------------------------------------------------|
| Sanyal et al. (2018) / India                     | Database search                | Between-groups observational study <ul style="list-style-type: none"> <li>T1: three months post-operation</li> </ul>                                | -                       | -                  | Resilience (recovery to normal functioning) is a predictor of increased quality of life scores in 'older' patients (55 to 70 years)<br>'Older' patients had greater resilience scores than 'younger' patients (30 to 45 years) |
| Zaini et al. (2022) / Malaysia                   | Database search                | Cross-sectional study <ul style="list-style-type: none"> <li>T1: pre-operation</li> </ul>                                                           | -                       | -                  | Older participants associated with greater proportion of psychological distress<br>Males had higher proportion of depression compared to females                                                                               |
| Social factors                                   |                                |                                                                                                                                                     |                         |                    |                                                                                                                                                                                                                                |
| Jenkins et al. (1983) / United States of America | Database search                | Prospective observational study <ul style="list-style-type: none"> <li>T0: baseline pre-operation</li> <li>T1: six months post-operation</li> </ul> | -                       | -                  | Psychological distress, wellbeing, fatigue and sleep improved from pre-operative levels                                                                                                                                        |
| Gilliss (1984) / United States of America        | Database search                | Prospective observational study <ul style="list-style-type: none"> <li>T0: baseline (week post-hospitalisation)</li> </ul>                          | -                       | -                  | Patient spouses has higher self-reported levels of stress compared to patients at hospitalisation<br>At six months, patients and                                                                                               |

| Author<br>(year)<br>and<br>country             | Search<br>Methodolog<br>y used | Methodological<br>design                                                                                               | Intervention<br>content | Control<br>content | Interesting<br>findings                                                                                                                                                                                                                                                                        |
|------------------------------------------------|--------------------------------|------------------------------------------------------------------------------------------------------------------------|-------------------------|--------------------|------------------------------------------------------------------------------------------------------------------------------------------------------------------------------------------------------------------------------------------------------------------------------------------------|
|                                                |                                | <ul style="list-style-type: none"> <li>T1: six months post-operation</li> </ul>                                        |                         |                    | spouses reported high levels of marital conflict                                                                                                                                                                                                                                               |
| Artinian (1993) / United States of America     | Database search                | Prospective exploratory study <ul style="list-style-type: none"> <li>T1: six weeks post-surgery</li> </ul>             | -                       | -                  | Perceived readiness for hospital discharge was predicted by patients' personal resources, social support, knowledge, and utilisation of coping strategies<br>The key influencers on patient partners were physicians, nurses, immediate family, and friends with experience of cardiac surgery |
| Moser et al. (1993) / United States of America | Citation search                | Prospective observational study <ul style="list-style-type: none"> <li>T1: five months post-hospitalisation</li> </ul> | -                       | -                  | Patients and their partners stated that information was the most important need<br>Patients and partners differed on the importance of other needs<br>Most needs (40% to 70%) were not met by nurses or physicians                                                                             |
| Oxman et al. (1995) / United States of America | Database search                | Prospective observational study <ul style="list-style-type: none"> <li>T0: baseline pre-operation</li> </ul>           | -                       | -                  | Lack of participation in social groups and absence of strength and comfort in                                                                                                                                                                                                                  |

| Author<br>(year)<br>and<br>country                        | Search<br>Methodolog<br>y used | Methodological<br>design                                                                                                                                                         | Intervention<br>content | Control<br>content | Interesting<br>findings                                                                                                                                                                                                                                                        |
|-----------------------------------------------------------|--------------------------------|----------------------------------------------------------------------------------------------------------------------------------------------------------------------------------|-------------------------|--------------------|--------------------------------------------------------------------------------------------------------------------------------------------------------------------------------------------------------------------------------------------------------------------------------|
|                                                           |                                | <ul style="list-style-type: none"> <li>• T1: one-month post-operation</li> <li>• T2: six months post-operation</li> </ul>                                                        |                         |                    | religion are two predictors of mortality                                                                                                                                                                                                                                       |
| Goodman (1997) / England                                  | Database search                | Retrospective interview study <ul style="list-style-type: none"> <li>• Interview at six-weeks post-operation</li> <li>• Diary entries during six weeks post-operation</li> </ul> | -                       | -                  | There were many issues for patients and not many were the same which suggests tailored approach is most suitable<br>Patients expressed desire for social interaction<br>Mixed psychological states between patients<br>Patients were mostly all informed of exercise knowledge |
| Davies (2000) / England                                   | Database search                | Prospective observational study <ul style="list-style-type: none"> <li>• T1: one-week post-discharge</li> <li>• T2: seven weeks post-discharge</li> </ul>                        | -                       | -                  | Higher satisfaction with information scores were associated with lower levels of anxiety and depression                                                                                                                                                                        |
| Robles & Kiecolt-Glaser (2003) / United States of America | Database search                | Narrative review                                                                                                                                                                 | -                       | -                  | Marital functioning is associated with physiological changes which in turn can influence long-term cardiovascular health                                                                                                                                                       |
| Eng et al. (2011) / Malaysia                              | Database search                | Systematic review and meta-analysis                                                                                                                                              | -                       | -                  | Unmarried participants with                                                                                                                                                                                                                                                    |



| Author<br>(year)<br>and<br>country               | Search<br>Methodolog<br>y used | Methodological<br>design                                                                                                                                                              | Intervention<br>content | Control<br>content | Interesting<br>findings                                                                                                                                                                                                                                                                 |
|--------------------------------------------------|--------------------------------|---------------------------------------------------------------------------------------------------------------------------------------------------------------------------------------|-------------------------|--------------------|-----------------------------------------------------------------------------------------------------------------------------------------------------------------------------------------------------------------------------------------------------------------------------------------|
|                                                  |                                |                                                                                                                                                                                       |                         |                    | cardiovascular disease were associated with higher self-reported depression compared to married participants Comorbidity with other diseases was associated with higher self-reported depression                                                                                        |
| De Fazio et al. (2012) / Italy                   | Database search                | Cross-sectional study <ul style="list-style-type: none"> <li>T1: within one-week post-surgery</li> </ul>                                                                              | -                       | -                  | Self-reported depression was associated with b-blocker therapy, Type D personality, and specific coping strategies<br>Self-reported anxiety was independently predicted by unmarried status, low education, unstable angina, Type D personality, emotion, and avoidance-oriented coping |
| Bucholz et al. (2014) / United States of America | Database search                | Prospective longitudinal study <ul style="list-style-type: none"> <li>T0: baseline</li> <li>T1: one-month post-hospitalisation</li> <li>T2: 12 months post-hospitalisation</li> </ul> | -                       | -                  | Lower perceived social support was associated with increased depression at 12 months post-operation                                                                                                                                                                                     |

| Author<br>(year)<br>and<br>country                                | Search<br>Methodolog<br>y used | Methodological<br>design                                                                                                                                                                                                        | Intervention<br>content | Control<br>content | Interesting<br>findings                                                                                                                                                                                                                                                                |
|-------------------------------------------------------------------|--------------------------------|---------------------------------------------------------------------------------------------------------------------------------------------------------------------------------------------------------------------------------|-------------------------|--------------------|----------------------------------------------------------------------------------------------------------------------------------------------------------------------------------------------------------------------------------------------------------------------------------------|
| Maneman<br>n et al.<br>(2018) /<br>United<br>States of<br>America | Database<br>search             | Prospective<br>observational<br>study <ul style="list-style-type: none"> <li>• T0: baseline</li> <li>• T1: one month<br/>after initial<br/>survey</li> <li>• T2: two<br/>months after<br/>initial survey</li> </ul>             | -                       | -                  | Patients with<br>high social<br>isolation had<br>3.5 times<br>greater risk of<br>death<br>Patients with<br>moderate<br>social isolation<br>were not<br>associated with<br>increased risk<br>of death or<br>hospitalisation                                                             |
| Nielsen et<br>al. (2019)<br>/ Sweden                              | Database<br>search             | Cross-sequential<br>study<br><br>Used the Swedish<br>Web-system for<br>Enhancement and<br>Development of<br>Evidence-Based<br>Care in Heart<br>Disease Evaluated<br>According to<br>Recommended<br>Therapies for<br>recruitment | -                       | -                  | Patients who<br>were never<br>married had a<br>higher risk of<br>mortality if<br>they were<br>women<br>compared to<br>men<br>Higher risk of<br>mortality in<br>lower income<br>men than<br>women when<br>comparing to<br>higher income<br>patients                                     |
| Caccamo<br>et al.<br>(2020) /<br>Italy                            | Database<br>search             | Prospective<br>observational<br>study <ul style="list-style-type: none"> <li>• T0: baseline<br/>before cardiac<br/>rehabilitation</li> <li>• T1: two weeks<br/>later (post-<br/>rehabilitation)</li> </ul>                      | -                       | -                  | Marital status<br>was associated<br>with different<br>self-reported<br>psychological<br>distress<br>outcomes post-<br>operation<br>Unmarried<br>participants<br>had greater<br>social<br>inhibition and<br>anxiety scores<br>compared to<br>married or<br>cohabitating<br>and divorced |

| Author<br>(year)<br>and<br>country                           | Search<br>Methodolog<br>y used | Methodological<br>design                                                                                       | Intervention<br>content                                                  | Control<br>content                                                      | Interesting<br>findings                                                                                                                                                                                                                                                                                                            |
|--------------------------------------------------------------|--------------------------------|----------------------------------------------------------------------------------------------------------------|--------------------------------------------------------------------------|-------------------------------------------------------------------------|------------------------------------------------------------------------------------------------------------------------------------------------------------------------------------------------------------------------------------------------------------------------------------------------------------------------------------|
|                                                              |                                |                                                                                                                |                                                                          |                                                                         | or widowed<br>participants                                                                                                                                                                                                                                                                                                         |
| Dhindsa et<br>al. (2020)<br>/ United<br>States of<br>America | Database<br>search             | Narrative literature<br>review                                                                                 | -                                                                        | -                                                                       | Unmarried<br>patients with<br>cardiovascular<br>disease have<br>an increased<br>rate of further<br>cardiac events<br>compared to<br>married<br>participants                                                                                                                                                                        |
| Health service factors                                       |                                |                                                                                                                |                                                                          |                                                                         |                                                                                                                                                                                                                                                                                                                                    |
| Asilioglu<br>& Celik<br>(2004) /<br>Turkey                   | Database<br>search             | Prospective<br>experimental study<br>• T1: three days<br>post-surgery                                          | Effect of pre-<br>operative<br>education on<br>post-operative<br>anxiety | Usual care<br>informed<br>of pre- and<br>post-<br>operative<br>routines | No statistical<br>differences in<br>either state or<br>trait anxiety<br>compared to<br>control                                                                                                                                                                                                                                     |
| Linden et<br>al. (2007)<br>/ Canada                          | Database<br>search             | Meta-analysis                                                                                                  | -                                                                        | -                                                                       | Psychological<br>treatment was<br>associated with<br>reduced<br>mortality and<br>cardiac events<br>Mortality<br>benefits was<br>found only in<br>males                                                                                                                                                                             |
| Shelley &<br>Pakenham<br>(2007) /<br>Australia               | Database<br>search             | Single-blind<br>randomised study<br>• T0: baseline<br>(pre-operation)<br>• T1: day of<br>hospital<br>discharge | -                                                                        | -                                                                       | High self-<br>efficacy locus<br>of control,<br>preparation<br>was related to<br>lower distress<br>for high self-<br>efficacy<br>participants<br>compared to<br>low self-<br>efficacy<br>Low self-<br>efficacy locus<br>of control,<br>preparation<br>was related to<br>lower distress<br>for low self-<br>efficacy<br>participants |

| Author<br>(year)<br>and<br>country | Search<br>Methodology used | Methodological<br>design                                                                                                                                                                                                                                                                                            | Intervention<br>content                                                                                   | Control<br>content                      | Interesting<br>findings                                                                                                                                                                                       |
|------------------------------------|----------------------------|---------------------------------------------------------------------------------------------------------------------------------------------------------------------------------------------------------------------------------------------------------------------------------------------------------------------|-----------------------------------------------------------------------------------------------------------|-----------------------------------------|---------------------------------------------------------------------------------------------------------------------------------------------------------------------------------------------------------------|
|                                    |                            |                                                                                                                                                                                                                                                                                                                     |                                                                                                           |                                         | compared to lower self-efficacy                                                                                                                                                                               |
| Sørli et al. (2007) / Norway       | Citation search            | RCT <ul style="list-style-type: none"> <li>• T0: baseline</li> <li>• T1: discharge from hospital</li> <li>• T2: two weeks post-discharge</li> <li>• T3: six weeks post-discharge</li> <li>• T4: six months post-discharge</li> <li>• T5: one-year post-discharge</li> <li>• T6: two years post-discharge</li> </ul> | Video information, individualised information by nurses. Carried out at hospital admission and discharge. | Standardised information with no video. | Patients from the intervention group had less anxiety at discharge to a year post-discharge compared to control<br>Intervention patients reported less depression from six months to two years post-discharge |
| Sharif et al. (2012) / Iran        | Database search            | RCT <ul style="list-style-type: none"> <li>• T0: baseline (discharge from hospital)</li> <li>• T1: immediately post-rehabilitation</li> <li>• T2: two months post-rehabilitation</li> </ul>                                                                                                                         | Eight cardiac rehabilitation sessions over four weeks                                                     | Given usual care and education booklet  | Depression scores were reduced for patients in the intervention group<br>Anxiety scores were not different between control and intervention groups                                                            |
| Okamoto & Motomura (2017) / Japan  | Database search            | Narrative review                                                                                                                                                                                                                                                                                                    | -                                                                                                         | -                                       | Limited number of studies investigating depression and anxiety among patients beyond six months post-operation<br>Patients improved psychological distress scores between three to six months post-operation  |

| Author<br>(year)<br>and<br>country | Search<br>Methodolog<br>y used | Methodological<br>design               | Intervention<br>content | Control<br>content | Interesting<br>findings                                                                                                                                                                                                                                                                                                                              |
|------------------------------------|--------------------------------|----------------------------------------|-------------------------|--------------------|------------------------------------------------------------------------------------------------------------------------------------------------------------------------------------------------------------------------------------------------------------------------------------------------------------------------------------------------------|
| Ng et al.<br>(2021) /<br>Singapore | Database<br>search             | Systematic review<br>and meta-analysis | -                       | -                  | Pre-operative<br>education<br>associated with<br>reducing pre-<br>operation<br>anxiety, length<br>of stay in<br>intensive care<br>units and<br>improving<br>knowledge<br>Lower<br>depression,<br>post-operative<br>anxiety and<br>higher<br>satisfaction<br>were also<br>associated with<br>pre-operative<br>education but<br>to a smaller<br>effect |

**Supplementary Table S2***Search Terms for Database Searches*

| Date       | Database                                                                                                                                                                                                                       | Search strategy                                                                                                                                                                                                                                                                                            | Result number | Field search                   | Limits / Filters    | Notes                                                                                                                                                                                                                                                                                |
|------------|--------------------------------------------------------------------------------------------------------------------------------------------------------------------------------------------------------------------------------|------------------------------------------------------------------------------------------------------------------------------------------------------------------------------------------------------------------------------------------------------------------------------------------------------------|---------------|--------------------------------|---------------------|--------------------------------------------------------------------------------------------------------------------------------------------------------------------------------------------------------------------------------------------------------------------------------------|
| 16/02/2022 | Ebscohost<br>Megafile<br>Ultimate.<br>Includes:<br>Academic<br>Search<br>Ultimate,<br>APA<br>PsycArticle<br>s, APA<br>PsycInfo,<br>CINAHL<br>with Full<br>Text, E-<br>Journals,<br>Psychology<br>and<br>Behavioral<br>Sciences | (cardiac<br>patient?)<br>AND<br>(depression<br>OR “mental<br>health” OR<br>“mental<br>illness” OR<br>anxiet* OR<br>anxious OR<br>stress* OR<br>distress*)<br>AND (“post-<br>operative”<br>OR<br>postoperativ<br>e OR postop<br>OR “post<br>surgery” OR<br>“after<br>surgery” OR<br>“following<br>surgery”) | 812           | Title-<br>abstract<br>-subject | English<br>language | Example of a<br>proximity<br>search; note<br>that there<br>might be<br>duplicates<br>due to<br>searching<br>multiple<br>databases.<br>Results<br>indicated the<br>keyword<br>stress was<br>relating<br>more to<br>physiologica<br>l stress<br>factors - try<br>removing the<br>term. |
| 16/02/2022 | Ebscohost<br>Megafile<br>Ultimate.                                                                                                                                                                                             | (cardiac N5<br>patient?)<br>AND<br>(depression<br>OR “mental<br>health” OR<br>“mental<br>illness” OR<br>anxiet* OR<br>anxious OR<br>distress*)<br>AND (“post-<br>operative”<br>OR<br>postoperativ<br>e OR postop<br>OR “post<br>surgery” OR<br>“after<br>surgery” OR                                       | 525           | Title-<br>abstract<br>-subject | English<br>language | Removed<br>stress as<br>keyword for<br>concept #2.                                                                                                                                                                                                                                   |

| Date       | Database                           | Search strategy                                                                                                                                                                                                                                                                     | Result number | Field search | Limits / Filters | Notes                                                          |
|------------|------------------------------------|-------------------------------------------------------------------------------------------------------------------------------------------------------------------------------------------------------------------------------------------------------------------------------------|---------------|--------------|------------------|----------------------------------------------------------------|
| 16/02/2022 | Ebscohost<br>Megafire<br>Ultimate. | “following surgery”) (“cardiac patient” OR “cardiac patients”) AND (depression OR “mental health” OR “mental illness” OR anxiet* OR anxious OR stress* OR distress*) AND (“post-operative” OR postoperativ e OR postop OR “post surgery” OR “after surgery” OR “following surgery”) | 355           | All          | None             | There might be duplicates due to searching multiple databases. |
| 16/02/2022 | Ebscohost<br>Megafire<br>Ultimate. | “cardiac patient” OR “cardiac patients”) AND (depression OR “mental health” OR “mental illness” OR anxiet* OR anxious OR stress* OR distress*) AND (“post-operative” OR postoperativ e OR postop OR “post surgery” OR                                                               | 315           | All          | English language | N/A                                                            |

| Date       | Database                                                                              | Search strategy                                                                                                                                                                                                                                                                                                                                         | Result number | Field search               | Limits / Filters | Notes |
|------------|---------------------------------------------------------------------------------------|---------------------------------------------------------------------------------------------------------------------------------------------------------------------------------------------------------------------------------------------------------------------------------------------------------------------------------------------------------|---------------|----------------------------|------------------|-------|
| 21/03/2022 | Ebscohost<br>Megafire<br>Ultimate.                                                    | “after surgery” OR<br>“following surgery”<br>(“cardiac patient” OR<br>“cardiac patients”)<br>AND<br>(depression<br>OR “mental health” OR<br>“mental illness” OR<br>anxiet* OR<br>anxious OR<br>stress* OR<br>distress*)<br>AND (“post-operative”<br>OR<br>postoperative OR postop<br>OR “post surgery” OR<br>“after surgery” OR<br>“following surgery”) | 104           | Title-abstract<br>-subject | English language | N/A   |
| 21/02/2022 | Cochrane<br>Trials.<br>Includes:<br>PubMed,<br>Embase,<br>CT.gov,<br>ICTRP,<br>CINAHL | (cardiac patient OR<br>cardiac patients)<br>AND<br>(depression<br>OR mental health OR<br>mental illness OR<br>anxiet* OR<br>anxious OR<br>stress* OR<br>distress*)<br>AND (post-operative<br>OR<br>postoperative OR postop                                                                                                                              | 1946          | Title-abstract<br>-subject | None             | N/A   |



| Date       | Database         | Search strategy                                                                                                                                                                                                                                               | Result number | Field search           | Limits / Filters | Notes                                                           |
|------------|------------------|---------------------------------------------------------------------------------------------------------------------------------------------------------------------------------------------------------------------------------------------------------------|---------------|------------------------|------------------|-----------------------------------------------------------------|
|            |                  | OR post surgery OR after surgery OR following surgery)                                                                                                                                                                                                        |               |                        |                  |                                                                 |
| 21/02/2022 | Cochrane Reviews | (“cardiac patient” OR “cardiac patients”) AND (depression OR “mental health” OR “mental illness” OR anxiet* OR anxious OR stress* OR distress*) AND (“post-operative” OR postoperative OR postop OR “post surgery” OR “after surgery” OR “following surgery”) | 0             | Title-abstract-subject | None             | Was not able to successfully search due to the quotation marks. |
| 21/02/2022 | Cochrane Reviews | (cardiac patient OR cardiac patients) AND (depression OR mental health OR mental illness OR anxiet* OR anxious OR stress* OR distress*) AND (post-operative OR                                                                                                | 27            | Title-abstract-subject | None             | N/A                                                             |

| Date       | Database         | Search strategy                                                                                                                                                                                                                               | Result number | Field search           | Limits / Filters | Notes                                                  |
|------------|------------------|-----------------------------------------------------------------------------------------------------------------------------------------------------------------------------------------------------------------------------------------------|---------------|------------------------|------------------|--------------------------------------------------------|
|            |                  | postoperative OR postop OR post surgery OR after surgery OR following surgery)                                                                                                                                                                |               |                        |                  |                                                        |
| 21/02/2022 | Cochrane Reviews | (cardiac patient OR cardiac patients) AND (depression OR mental health OR mental illness OR anxiet* OR anxious OR stress* OR distress*) AND (post-operative OR postoperative OR postop OR post surgery OR after surgery OR following surgery) | 28            | Title-abstract-subject | None             | N/A                                                    |
| 23/02/2022 | Springer         | ("cardiac patient" OR "cardiac patients") AND (depression OR "mental health" OR "mental illness" OR anxiet* OR anxious OR stress* OR distress*) AND ("post-                                                                                   | 0             | All                    | None             | Was not able to successfully search using these terms. |

| Date       | Database | Search strategy                                                                                                                                                                                                                                                                                                         | Result number | Field search | Limits / Filters                                   | Notes |
|------------|----------|-------------------------------------------------------------------------------------------------------------------------------------------------------------------------------------------------------------------------------------------------------------------------------------------------------------------------|---------------|--------------|----------------------------------------------------|-------|
|            |          | operative”<br>OR<br>postoperativ<br>e OR postop<br>OR “post<br>surgery” OR<br>“after<br>surgery” OR<br>“following<br>surgery”)                                                                                                                                                                                          |               |              |                                                    |       |
| 23/02/2022 | Springer | (cardiac<br>patient OR<br>cardiac<br>patients)<br>AND<br>(depression<br>OR mental<br>health OR<br>mental<br>illness OR<br>anxiet* OR<br>anxious OR<br>stress* OR<br>distress*)<br>AND (post-<br>operative<br>OR<br>postoperativ<br>e OR postop<br>OR post<br>surgery OR<br>after surgery<br>OR<br>following<br>surgery) | 130           | All          | None                                               | N/A   |
| 23/02/2022 | Springer | (cardiac<br>patient OR<br>cardiac<br>patients)<br>AND<br>(depression<br>OR mental<br>health OR<br>mental<br>illness OR<br>anxiet* OR<br>anxious OR<br>stress* OR                                                                                                                                                        | 109           | All          | Article,<br>chapter<br>and<br>conferenc<br>e paper | N/A   |

| Date       | Database      | Search strategy                                                                                                                                                                                                                                                                                               | Result number | Field search | Limits / Filters | Notes                                                                                       |
|------------|---------------|---------------------------------------------------------------------------------------------------------------------------------------------------------------------------------------------------------------------------------------------------------------------------------------------------------------|---------------|--------------|------------------|---------------------------------------------------------------------------------------------|
|            |               | distress*)<br>AND (post-operative<br>OR<br>postoperative<br>OR postop<br>OR post<br>surgery OR<br>after surgery<br>OR<br>following<br>surgery)                                                                                                                                                                |               |              |                  |                                                                                             |
| 23/02/2022 | ScienceDirect | ("cardiac patient" OR<br>"cardiac patients")<br>AND<br>(depression<br>OR "mental health" OR<br>"mental illness" OR<br>anxiet* OR<br>anxious OR<br>stress* OR<br>distress*)<br>AND ("post-operative"<br>OR<br>postoperative<br>OR postop<br>OR "post surgery" OR<br>"after surgery" OR<br>"following surgery") | 0             | All          | None             | Was not able to successfully search. Error message: Max. of 8 boolean connectors per field. |
| 23/02/2022 | ScienceDirect | ("cardiac patient")<br>AND<br>(depression<br>OR anxiet*<br>OR anxious<br>OR stress*<br>OR<br>distress*)<br>AND ("post-operative"                                                                                                                                                                              | 0             | All          | None             | Was not able to successfully search. Error message: Wildcards '*' not supported.            |

| Date       | Database      | Search strategy                                                                                                                                                                            | Result number | Field search     | Limits / Filters                                         | Notes |
|------------|---------------|--------------------------------------------------------------------------------------------------------------------------------------------------------------------------------------------|---------------|------------------|----------------------------------------------------------|-------|
| 23/02/2022 | ScienceDirect | OR “post surgery” OR “following surgery”) (“cardiac patient”) AND (depression OR anxiety OR anxious OR stress OR distress) AND (“post-operative” OR “post surgery” OR “following surgery”) | 3740          | All              | None                                                     | N/A   |
| 4/03/2022  | ScienceDirect | (“cardiac patient”) AND (depression OR anxiety OR anxious OR distress) AND (“post-operative” OR “post surgery” OR “following surgery”)                                                     | 2752          | All              | None                                                     | N/A   |
| 4/03/2022  | ScienceDirect | (“cardiac patient”) AND (depression OR anxiety OR anxious OR distress) AND (“post-operative” OR “post surgery” OR “following surgery”)                                                     | 1953          | All              | Review articles, research articles, conference abstracts | N/A   |
| 4/03/2022  | ScienceDirect | (“cardiac patient”) AND (depression                                                                                                                                                        | 19            | Title-abstract - | None                                                     | N/A   |

| Date       | Database      | Search strategy                                                                                                                                                                                                                                                                                            | Result number | Field search | Limits / Filters | Notes                                                                                                            |
|------------|---------------|------------------------------------------------------------------------------------------------------------------------------------------------------------------------------------------------------------------------------------------------------------------------------------------------------------|---------------|--------------|------------------|------------------------------------------------------------------------------------------------------------------|
|            |               | OR anxiety<br>OR anxious<br>OR stress<br>OR distress)<br>AND (“post-operative”<br>OR “post surgery” OR<br>“following surgery”)                                                                                                                                                                             |               | keywords     |                  |                                                                                                                  |
| 22/02/2022 | SAGE Journals | (“cardiac patient” OR<br>“cardiac patients”)<br>AND<br>(depression<br>OR “mental health” OR<br>“mental illness” OR<br>anxiet* OR<br>anxious OR<br>stress* OR<br>distress*)<br>AND (“post-operative”<br>OR<br>postoperative OR postop<br>OR “post surgery” OR<br>“after surgery” OR<br>“following surgery”) | 0             | All          | None             | Unable to successfully search. Error message: Service inaccessible The IP address 139.86.7.217 has been blocked. |
